# Supplementary material
Source: PubMed Central journal article supplement (PMC4490924)
Supplement: 10-1055-s-0035-1546120-sup_gf931.pdf [file 10-1055-s-0035-1546120-sup_gf931.pdf]

# Primärtherapie bei Patientinnen mit Mammakarzinom: Evidenz, Kontroversen, Konsens

## Meinungsbild deutscher Experten zur 14. Internationalen St.-Gallen-Konsensuskonferenz (Wien 2015)

Primary Therapy of Patients with Early Breast Cancer: Evidence, Controversies, Consensus

Opinions of German Specialists to the 14th St. Gallen International Breast Cancer Conference 2015 (Vienna 2015)

### Autoren

M. Untch<sup>1</sup>, N. Harbeck<sup>2\*</sup>, J. Huober<sup>3\*</sup>, G. von Minckwitz<sup>4\*</sup>, B. Gerber<sup>5</sup>, H.-H. Kreipe<sup>6</sup>, C. Liedtke<sup>7</sup>, N. Marschner<sup>8</sup>, V. Möbus<sup>9</sup>, H. Scheithauer<sup>10</sup>, A. Schneeweiss<sup>11</sup>, C. Thomssen<sup>12</sup>, C. Jackisch<sup>13</sup>, M. W. Beckmann<sup>14</sup>, J.-U. Blohmer<sup>15</sup>, S.-D. Costa<sup>16</sup>, T. Decker<sup>17</sup>, I. Diel<sup>18</sup>, P. A. Fasching<sup>19</sup>, T. Fehm<sup>20</sup>, W. Janni<sup>21</sup>, H.-J. Lück<sup>22</sup>, N. Maass<sup>23</sup>, A. Scharl<sup>24</sup>, S. Loibl<sup>25</sup>

### Institute

Die Institutsangaben sind am Ende des Beitrags gelistet.

### Schlüsselwörter

- Mammakarzinom
- St.-Gallen-Konsensus
- adjuvante Therapie
- neoadjuvante Therapie
- Multigen Signaturen

### Key words

- breast cancer
- St. Gallen consensus
- adjuvant therapy
- neoadjuvant therapy
- multigene signatures

**eingereicht** 2.5.2015  
**revidiert** 17.5.2015  
**akzeptiert** 17.5.2015

### Bibliografie

**DOI** <http://dx.doi.org/10.1055/s-0035-1546120>  
 Online-publiziert 17.06.2015  
 Geburtsh Frauenheilk 2015; 75: 1–11 © Georg Thieme  
 Verlag KG Stuttgart · New York ·  
 ISSN 0016-5751

### Korrespondenzadresse

**Prof. Michael Untch**  
 HELIOS Klinikum Berlin-Buch  
 Klinik für Gynäkologie  
 und Geburtshilfe  
 Schwanebecker Chaussee 50  
 13125 Berlin  
 michael.untch@  
 helios-kliniken.de

### Zusammenfassung

Die alle 2 Jahre stattfindende internationale Konsensuskonferenz in St. Gallen zur Behandlung von Patientinnen mit primärem Mammakarzinom wurde dieses Jahr zum 14. Mal veranstaltet und fand aus logistischen Gründen erstmals nicht in St. Gallen (Schweiz), sondern unter gleichem Namen in Wien (Österreich) statt. Da sich das internationale Panel in St. Gallen aus Experten unterschiedlicher Länder zusammensetzt, spiegelt der Konsensus ein internationales Meinungsbild wider. Aus deutscher Sicht erscheint es daher sinnvoll, die Abstimmungsergebnisse vor dem Hintergrund der aktualisierten Therapieempfehlungen der Arbeitsgemeinschaft Gynäkologische Onkologie (AGO-Mamma 2015) für den Therapiealltag in Deutschland zu konkretisieren. Eine deutsche Arbeitsgruppe aus 14 Brustkrebsexperten, von denen 3 Mitglieder des internationalen St.-Gallen-Panels sind, hat daher die Abstimmungsergebnisse der St.-Gallen-Konsensuskonferenz 2015 für den Klinikalltag in Deutschland zeitnah kommentiert. Inhaltliche Schwerpunkte der 14. St.-Gallen-Konferenz waren erneut operative Fragestellungen der Brust und der Axilla, radioonkologische und systemische Therapieoptionen des primären Mammakarzinoms unter Berücksichtigung der Tumorbiologie sowie der klinische Einsatz von Multigen-Assays. Ein Fokus lag zudem auf der Behandlung älterer und jüngerer Patientinnen, inkl. spezieller Situationen wie die Diagnostik/Behandlung eines Mammakarzinoms in und nach einer Schwangerschaft sowie dem Erhalt der Fertilität.

### Abstract

For the first time, this year's St. Gallen International Consensus Conference on the treatment of patients with primary breast cancer, which takes place every two years, was held not in St. Gallen (Switzerland) but – for logistical reasons – in Vienna (Austria) under its usual name. The 2015 St. Gallen International Consensus Conference was the 14th of its kind. As the international panel of the St. Gallen conference consists of experts from different countries, the consensus mirrors an international cross-section of opinions. From a German perspective, it was considered useful to translate the results of the votes of the St. Gallen conference into practical suggestions, particularly in light of the recently updated treatment guideline of the Gynecologic Oncology Group (AGO-Mamma 2015) in Germany. A German group consisting of 14 breast cancer experts, three of whom are members of the international St. Gallen panel, has therefore provided comments on the results of this year's votes at the 2015 St. Gallen Consensus Conference and their impact on clinical care in Germany. The 14th St. Gallen conference once again focused on surgery of the breast and the axilla, radio-oncologic and systemic treatment options for primary breast cancer depending on tumor biology, and the clinical use of multigene assays. The conference also considered targeted therapies for older and for younger patients, including the diagnosis/treatment of breast cancer during and after pregnancy and the preservation of fertility.

\* St. Gallen Panel Expert

## Einleitung

Die St.-Gallen-Konsensuskonferenz zur Behandlung des primären Mammakarzinoms hat unverändert weltweite Bedeutung. Das Panel der diesjährigen 14. St.-Gallen-Konsensuskonferenz bestand aus 49 Experten aus insgesamt 19 Ländern, darunter 3 Vertreter aus Deutschland. Die Empfehlungen basieren auf einem Mehrheitsvotum der Panelisten. Diese repräsentieren unterschiedliche Fachgebiete und Länder aller Kontinente mit unterschiedlichen Gesundheitssystemen und Ressourcen. Unter diesen Rahmenbedingungen spiegelt der erzielte Konsens im Wesentlichen ein Meinungsbild der Experten wider, auch wenn die Einzelmeinungen und damit letztlich das gesamte Meinungsbild auf publizierten, evidenzbasierten Daten basieren. Die Hauptpublikation zur diesjährigen St.-Gallen-Konsensuskonferenz ist seit dem 12. Mai online in *Annals of Oncology* [1] verfügbar. Gleichwohl erscheint es vor diesem Hintergrund sinnvoll, die Abstimmungsergebnisse aus deutscher Sicht zu kommentieren. Dies geschieht vor dem Hintergrund der Therapieempfehlungen der Organisationskommission Mamma der Arbeitsgemeinschaft Gynäkologische Onkologie (AGO) aus dem Jahr 2015 [1].

## Grundlage des St.-Gallen-Konsensus

Im Fokus der St.-Gallen-Konsensuskonferenz stehen neben den klassischen Themen der (neo)adjuvanten Systemtherapie auch lokoregionäre chirurgische und strahlentherapeutische Entwicklungen. Ein Thema von zunehmender Bedeutung ist dabei die unterschiedliche Biologie einer Brustkrebserkrankung, die prognostisch und deshalb auch zunehmend therapeutisch immer wichtiger wird. Ziel ist es, ein mehrheitsfähiges und praxisnahes Meinungsbild der Panelmitglieder zu erarbeiten und im Idealfall einen Konsens für den klinischen Alltag herzustellen. Ist dies nicht möglich, geht es darum, unter Berücksichtigung länderspezifischer Unterschiede einen pragmatischen Lösungsansatz zu erarbeiten oder Fragestellungen zu definieren, die im Rahmen kontrollierter, klinischer Studien in Zukunft zu klären sind.

Ein Teil der zur Abstimmung gestellten Fragen wurde von den Panelisten mit „ja“ (Zustimmung), „nein“ (Ablehnung) oder „Enthaltung“ (keine ausreichende Datenlage, keine Stellungnahme möglich) beantwortet. Bei anderen Fragen ging es darum, sich zwischen mehreren Optionen zu entscheiden.

## Operative Therapie

Im Fokus der operativen Fragestellungen beim primären Mammakarzinom standen in St. Gallen der Resektionsrand und das operative Vorgehen in der Axilla sowohl bei primärer Operation als auch nach neoadjuvanter Chemotherapie.

### Resektionsrand nach brusterhaltender Operation (BET)

Wird eine Patientin mit invasivem Mammakarzinom brusterhaltend operiert und ist nachfolgend eine adjuvante Bestrahlung plus systemische Behandlung geplant, muss der Tumor mit tumorfreiem Schnittrand (R0) reseziert werden (keine invasiven Tumorzellen an der Farbmarkierung). Die deutsche Expertenkommission stimmt hier dem Mehrheitsvotum der St.-Gallen-Panelisten zu, dass kein zusätzlicher Sicherheitsabstand notwendig ist. Laut Mehrheitsabstimmung in St. Gallen ist eine brusterhaltende Operation sowohl bei einem multifokalen (ja: 71%) als auch einem multizentrischen (unilateralen; ja: 80%) invasivem Mammakarzinom möglich – vorausgesetzt, dass ein tumorfreier

Schnittrand erreicht und nachfolgend eine adjuvante Bestrahlung durchgeführt wird. Die deutschen Experten schränken dieses Votum insofern ein, als sie für das multizentrische (unilaterale) Mammakarzinom auf die aktuelle AGO-Empfehlung 2015 [2] verweisen. Danach ist die brusterhaltende Operation bei diesen Patientinnen eine Einzelfallentscheidung – in Abhängigkeit davon, wie weit die einzelnen Läsionen auseinander liegen. Voraussetzung ist, dass im Gespräch mit der Patientin die onkologische Sicherheit, aber auch ein gutes operativ-kosmetisches Ergebnis besprochen werden. Im Einzelfall kann daher auch eine Mastektomie (hautsparend oder subkutan) mit Sofortrekonstruktion z. B. mit einem Implantat (mit oder ohne Netz) infrage kommen. Die deutsche Arbeitsgruppe stimmt dem Mehrheitsvotum der St.-Gallen-Panelisten zu, dass der Abstand des Resektionsrandes nicht von der Tumorbilogie abhängt und dass bei jüngeren Patientinnen (< 40 Jahre) sowie Patientinnen mit lobulärem Mammakarzinom kein zusätzlicher (größerer) Sicherheitsabstand notwendig ist. Das gilt auch für die Operation nach neoadjuvanter Chemotherapie (NACT) oder bei ausgedehnten intraduktalen Tumoranteilen. Bei Patientinnen mit einem rein intraduktalen Karzinom (DCIS) empfiehlt die deutsche Arbeitsgruppe dagegen einen Resektionsrand von mindestens 2 mm [2]. Sie schließt sich hier nicht dem St.-Gallen-Votum an. Um eine adäquate klinisch-pathologische Aufarbeitung der Befunde zu gewährleisten, empfiehlt die deutsche Arbeitsgruppe, die Situation prä- und postoperativ im interdisziplinär zusammengesetzten Tumorboard anhand der aktuellen Bildgebung zu besprechen.

### Operatives Vorgehen nach NACT

Das St.-Gallen-Panel hat keine Empfehlung zur Behandlung der Axilla vor oder nach neoadjuvanter Therapie bei Patientinnen mit palpatorisch und sonografisch unauffälliger Axilla gegeben. In diesem Zusammenhang verweist die deutsche Expertengruppe auf die aktuelle AGO-Therapieempfehlung 2015 [2], in der für diese Situation (cN0 vor NACT) beide Möglichkeiten bestehen: Die Sentinel-Lymphknoten-Biopsie (SNB: sentinel node biopsy) kann vor (praktischerweise mit der Portanlage) oder nach neoadjuvanter Therapie erfolgen. Die Präferenz liegt auf der SNB vor NACT (AGO LoE 2b GR B + vs. LoE 2a GR B ± nach NACT). Bei nicht befallenen Sentinel-Lymphknoten kann nach NACT auf eine Axilladissektion (ALND: axillary lymph node dissection) verzichtet werden.

Ausführlich diskutiert wurde die Frage, ob bei einer Patientin mit palpatorisch und/oder sonografisch suspekten Lymphknoten (cN+) bei Erstdiagnose, die nach NACT klinisch/sonografisch unauffällig (ycN0) ist (sog. „down-staging“), eine SNB ausreicht oder ob bzw. wann eine komplette ALND notwendig ist. Die St.-Gallen-Panelisten sind mehrheitlich der Ansicht, dass nach NACT eine SNB bei diesen Patientinnen ein adäquates Vorgehen ist. Im Falle eines oder mehrerer befallener Sentinel-Lymphknoten ist das St.-Gallen-Panel der Ansicht, dass eine ALND erfolgen sollte.

Die deutsche Arbeitsgruppe stimmt dieser Empfehlung aufgrund der Daten der ACOSOG-Studie Z1071 [3] zu. Ergänzend wird festgestellt, dass der klinisch suspekten Lymphknoten vor NACT zytologisch (Feinnadelaspiration) oder besser histologisch (Stanzbiopsie) abgeklärt und – wenn möglich – mittels Clip markiert werden sollte. Nach erfolgreicher NACT (ycN0) empfiehlt die deutsche Arbeitsgruppe, im Einzelfall zu entscheiden, ob eine SNB ausreicht oder eine ALND indiziert ist [2]. Die Verlässlichkeit der SNB nach NACT (bei cN+ vor NACT) hängt, so die deutsche Arbeitsgruppe, von der Anzahl der entnommenen Lymphknoten ab. In den beiden vorliegenden Studien zu dieser Fragestellung

**Tab. 1** Empfehlungen der AGO Organkommission Mamma 2015 zur operativen Therapie der Axilla vor und nach NACT [2] (SLNB: Sentinel Lymphknotenbiopsie, NACT: neoadjuvante Chemotherapie, LoE: Level of Evidence, GR: Grade of Recommendation, BET: brusterhaltende Therapie, ALND: axilläre Lymphadenektomie, CNB: Core Needle Biopsy, FNA: Fine Needle Aspiration, ACOSOG: American College of Surgeons Oncology Group, SNB: Sentinel Node Biopsy).

|                                                     |                               |                       |                     | Oxford/AGO<br>LoE/GR |   |    |
|-----------------------------------------------------|-------------------------------|-----------------------|---------------------|----------------------|---|----|
| SLNB vor oder nach NACT bei cN0                     |                               |                       |                     |                      |   |    |
| SLNB vor NACT                                       |                               |                       |                     | 2b                   | B | +  |
| SLNB nach NACT*                                     |                               |                       |                     | <b>2b</b>            | B | ±  |
| weitere operative Therapie in Abhängigkeit von SLNB |                               |                       |                     |                      |   |    |
| cN-Status (vor NACT)                                | pN-Status (vor NACT)          | cN-Status (nach NACT) | operatives Vorgehen |                      |   |    |
| cN0                                                 | pN0(sn)                       | –                     | nihil               | 1a                   | A | +  |
| cN0                                                 | pN+(sn) analog ACOSOG Z11**   | ycN0                  | ALND                | 3                    | B | ±  |
| cN0                                                 | pN+(sn) nicht analog ACOSOG** | ycN0                  | ALND                | 2b                   | B | +  |
| cN+                                                 | cN+ (CNB/FNA)                 | ycN0                  | SNB*                | <b>2b</b>            | B | ±  |
|                                                     |                               |                       | ALND                | 2b                   | B | +  |
|                                                     |                               |                       | ALND                | 2b                   | B | ++ |

\* Technetium + Patentblau; \*\* T1/T2, BET, 1–2 SLN pos., Tangentialfeldbestrahlung der Brust

lag die falsch negative Rate bei 1–2 untersuchten Lymphknoten (die nicht befallen waren) zwischen 18 und 21% und erst bei 3 entnommenen und untersuchten Lymphknoten unter 10%.

Die deutsche Arbeitsgruppe weist darauf hin, dass erst bei 3 entnommenen und tumorfreien Lymphknoten die falsch negative Rate (FNR: negativer SN, aber positive Axilla) mit der FNR bei primär-operativem Vorgehen gleichzusetzen ist. Dies entspricht der international akzeptierten falsch negativen Rate im primär operativen Ansatz. In Absprache mit der Patientin kann daher auf die ALND zugunsten einer alleinigen SNB verzichtet werden. Bei einer Patientin mit histologisch befallenen Lymphknoten vor NACT und 1–2 befallenen (Sentinel-)Lymphknoten nach NACT (ypN+ SN) empfiehlt das deutsche Gremium dagegen mit Verweis auf die aktuellen Studiendaten, eine ALND durchzuführen [3–5] (● **Tab. 1**). Einigkeit besteht auch darüber, dass der Primärtumor nach NACT innerhalb der neuen Tumorgrenzen operiert werden soll.

Die deutsche Arbeitsgruppe stimmt den St.-Gallen-Panelisten zu, dass bei einer Patientin mit 1–2 makrometastatisch befallenen Sentinel-Lymphknoten im Rahmen der Primäroperation auf eine ALND verzichtet werden kann. Voraussetzung ist die Erfüllung der ACOSOG-Z0011-Kriterien [6]: Tumor bis zu einer Größe von 5 cm (pT1–2), kein extranodaler Lymphknotenbefall, brusterhaltende Operation, adäquate adjuvante Systemtherapie, adjuvante Tangentialfeldbestrahlung. Im Fall einer Mastektomie sollte auch bei einem makrometastatisch befallenen Sentinel-Lymphknoten eine ALND indiziert werden. Alternativ kann in dieser Situation bei Patientinnen nach Mastektomie, bei denen postoperativ eine Strahlentherapie geplant ist, auf die ALND verzichtet werden. Dies sollte im interdisziplinären Tumorboard und mit der Patientin besprochen und jeweils individuell entschieden werden. Die deutsche Arbeitsgruppe verweist auf die aktuelle AGO-Therapieempfehlung 2015 [2].

## Adjuvante Strahlentherapie

### Teilbrust-Bestrahlung nach brusterhaltender Operation

Die St.-Gallen-Panelisten sehen mehrheitlich in der Teilbrust-Bestrahlung eine definitive Strahlenbehandlung (ohne Ganzbrust-Bestrahlung) bei Patientinnen, die nach den Kriterien der ASTRO (American Society of Radiation-Oncology) und der ESTRO (European Society for Radiotherapy & Oncology) als geeignet einge-

stuft werden [7–10]. Von der ASTRO als „suitable“ werden Patientinnen mit folgenden Kriterien eingestuft:  $\geq 60$  Jahre, fehlende BRCA-1/2-Mutation, HR+, Tumor  $\leq 2$  cm (T1), freier Resektionsrand  $\geq 2$  mm, N0, fehlende Lymphgefäßinvasion, unizentrisch/-fokal, invasiv-duktral oder sonstige günstige Histologie (muzinös, tubulär, kolloid), fehlende extensive intraduktale Komponente. Bei Patientinnen mit DCIS oder einer vorausgegangenen neoadjuvanten Chemotherapie ist eine alleinige Teilbrustbestrahlung nicht indiziert. Allerdings gibt es bereits positive publizierte Daten zur IORT (intraoperative radiotherapy) als vorgezogener Boost nach NACT. Die ESTRO hat bei der Auswahl der Kriterien nur geringfügige Unterschiede und zwar beim Alter ( $\geq 50$  Jahre) und beim T-Stadium (pT1–2). Ansonsten gelten die Kriterien der ASTRO [7–10].

Das St.-Gallen-Panel empfiehlt Patientinnen, welche die ESTRO als „intermediate“ und die ASTRO als „cautionary“ bewertet, nicht mit einer Teilbrustbestrahlung zu behandeln, da Ergebnisse aus verschiedenen Studien noch ausstehen. Das St.-Gallen-Votum, das darauf hinweist, dass die Teilbrust-Bestrahlung nicht nur eine Option für Patientinnen mit günstiger Tumorbiologie sein könnte, ist ungenau, da die Patientenselektionskriterien nicht hinreichend definiert sind. Hier sind weitere klinische Studien anzuraten.

Die deutsche Arbeitsgruppe verweist auf die aktuellen AGO-Therapieempfehlungen 2015 [2]. Die alleinige Teilbrust-Bestrahlung ist in Deutschland danach derzeit kein Standard. Sie kann im Einzelfall als alleinige Radiotherapiemaßnahme bei Patientinnen mit günstiger Tumorbiologie und niedrigem Rezidivrisiko (pT1 pN0 R0 G1–2, HR+, HER2–, nicht lobulär,  $> 50$  Jahre, kein extensives DCIS) als interstitielle Brachytherapie oder als intraoperative Bestrahlung mittels 50 kV oder Elektronen eingesetzt werden (LOE 1b B ±). Darüber hinaus ist die intraoperative Bestrahlung als vorgezogener Boost vor einer Ganzbrust-Bestrahlung möglich (LOE 2b B +) und kann die Gesamtdauer der Bestrahlung verkürzen.

### Hypofraktionierte Bestrahlung nach BET

Die hypofraktionierte Bestrahlung (ohne Boost; 15–16 Fraktionen mit jeweils 2,67 Gy) nach BET ist aus deutscher Sicht für Patientinnen  $> 65$  Jahre mit niedrigem Risiko gegenüber der Normfraktionierung (25 Fraktionen à 2 Gy) zu bevorzugen. Bei höherem Risiko sowie bei Patientinnen vom 40. bis zum 65. Lebensjahr sind sowohl die konventionelle Bestrahlung mit integrierem bzw. sequenziellem Boost als auch die hypofraktionierte Be-

**Tab. 2** Empfehlungen der AGO Organkommission Mamma 2015 zur Strahlentherapie nach brusterhaltender Operation [2] (LoE: Level of Evidence, RT: Radiotherapie, BEO: brusterhaltende Operation).

| Radiotherapie (RT) nach brusterhaltenden Operationen (BEO; invasive Karzinome): Bestrahlung der Brust |                                                                                                                  |
|-------------------------------------------------------------------------------------------------------|------------------------------------------------------------------------------------------------------------------|
| LoE 1b B                                                                                              | AGO ++                                                                                                           |
| < 40 Jahre                                                                                            | konventionelle RT (25–28 Fraktionen) mit integriertem oder sequenziellem Boost                                   |
| 40–65 Jahre                                                                                           | konventionelle RT mit integriertem oder sequenziellem Boost, oder hypofraktionierte RT mit sequenziellem Boost   |
| > 65 Jahre                                                                                            | niedriges Risiko: hypofraktionierte RT ohne Boost (15–16 Fraktionen)                                             |
|                                                                                                       | hohes Risiko: RT wie für 40–65 Jahre                                                                             |
| ältere Patienten                                                                                      | individuelle Beratung einschließlich Verzicht auf RT je nach individuellem Risiko und geriatrischer Einschätzung |
| jedes Alter (Lymphabflusswege)                                                                        | bei zusätzlicher Bestrahlung der Lymphabflusswege konventionell fraktionierte RT (25–28 Fraktionen)              |

Studienteilnahme empfohlen

strahlung mit sequenziellem Boost valide Therapieoptionen. Keine Indikation für eine hypofraktionierte Bestrahlung sieht die AGO bei Frauen unter 40 Jahre und bei Bestrahlung des supra-infraklavikulären Lymphabflusses; hier wird die konventionelle Bestrahlung empfohlen (● Tab. 2) [2].

Das Mehrheitsvotum in St. Gallen geht hier deutlich über die deutsche Therapieempfehlung hinaus zugunsten der Hypofraktionierung: Die St.-Gallen-Panelisten sehen mehrheitlich eine Indikation für die hypofraktionierte Bestrahlung unabhängig vom Alter. Ebenfalls altersunabhängig besteht laut St.-Gallen-Votum eine Indikation für die hypofraktionierte Bestrahlung auch bei Patientinnen mit vorheriger adjuvanter Chemotherapie oder axillärem Lymphknotenbefall und damit Indikation für eine Lymphabflussbestrahlung.

### Bestrahlung der Lymphabflussgebiete nach BET

Alle St.-Gallen-Panelisten und die deutsche Arbeitsgruppe sind sich einig, dass Patientinnen ohne Lymphknotenbefall (pN0) nach BET keine adjuvante Bestrahlung der Lymphabflussgebiete benötigen. Bei Patientinnen mit Lymphknotenbefall reicht die alleinige Bestrahlung der Brust nicht aus. Die deutsche Arbeitsgruppe stimmt der Mehrheit der Panelisten zu, dass bei diesen Patientinnen zusätzlich die regionalen Lymphknoten, allerdings ohne Einschluss der Mammaria-interna-Lymphknoten bestrahlt werden, verweist aber auch hier auf die aktuelle AGO-Leitlinie von 2015. Hiernach wird weiterhin zwischen 1–3 und  $\geq 4$  befallenen Lymphknoten unterschieden. Eine klare Indikation für die zusätzliche Bestrahlung des Lymphabflusses besteht ab 4 befallenen Lymphknoten. Bei 1–3 befallenen Lymphknoten wurden die Daten von der DEGRO und der AGO unterschiedlich interpretiert. So sieht die DEGRO eine Indikationsstellung zur Thoraxwandbestrahlung bei 1–3 befallenen Lymphknoten, die AGO dagegen nur bei zusätzlichen Risikofaktoren wie z. B. jungem Alter und aggressiver Tumorbologie.

### Strahlentherapie nach Mastektomie

Hier muss zunächst zwischen der Indikation für die Bestrahlung der Thoraxwand und der des Lymphabflusses unterschieden werden. Für die Bestrahlung des Lymphabflusses gelten die gleichen Regeln wie bei der BET. Laut AGO-Empfehlung [2] ist für mastektomierte Patientinnen die adjuvante Bestrahlung der Tho-

raxwand Standard bei T3/T4-Karzinomen (außer „low risk“), bei befallenen Lymphknoten (DEGRO-Empfehlung bei jedem Risiko, AGO unterscheidet hier zwischen hohem und niedrigem Risiko) sowie bei Patientinnen, bei denen keine RO-Resektion möglich war.

Die St.-Gallen-Panelisten bestätigten mehrheitlich, dass nach Ablatio ab einer Tumorgöße von mehr als 5 cm die Thoraxwand adjuvant bestrahlt werden sollte. Sie sehen keine generelle Indikation für eine adjuvante Bestrahlung bei Patientinnen mit 1–3 befallenen Lymphknoten, empfehlen diese aber bei ungünstiger Tumorbologie. Die Hälfte der Panelisten sieht darüber hinaus eine Indikation bei jungen Frauen (< 40 Jahre) mit 1–3 befallenen Lymphknoten. Die deutsche Arbeitsgruppe stimmt diesen Abstimmungsergebnissen grundsätzlich zu und verweist darauf, dass die Indikation entsprechend der AGO-Empfehlung [2] risikoadaptiert erfolgen sollte – speziell bei Patientinnen mit 1–3 befallenen axillären Lymphknoten. In der AGO ist das Risiko wie folgt beschrieben: „Es kann ein niedriges lokales Rezidivrisiko angenommen werden, wenn wenigstens drei der folgenden vier Faktoren erfüllt sind; pT1, Grad 1, HR-positiv, HER2-negativ. Bei jüngerem Alter (< 45 Jahre), medialem Tumorsitz oder negativem ER-Status wird dagegen ein erhöhtes lokales Rezidivrisiko angenommen.“

Eine Indikation für eine adjuvante Strahlentherapie nach Mastektomie sehen die St.-Gallen-Panelisten darüber hinaus bei Patientinnen mit positiver SNB, wenn keine ALND durchgeführt wurde. Keine Indikation sehen die Panelisten dagegen bei tumorfreien Lymphknoten (pN0) nach ALND, wenn keine SNB erfolgte und weniger als 8 Lymphknoten entnommen und histologisch untersucht wurden. Die deutsche Arbeitsgruppe verweist hier erneut auf die AGO-Empfehlungen 2015 [2], die bei pT3-pN0-Patientinnen die Indikation zur adjuvanten Strahlentherapie nach Mastektomie von der Risikokonstellation abhängig macht: Ohne zusätzliche Risikofaktoren ist sie eine „kann“-Option, bei jungen Frauen mit erhöhtem Risiko (z. B. einer ungünstigen Tumorbologie) wird die adjuvante Bestrahlung mit Doppelplus empfohlen (LoE 1a A++).

Besteht nach Mastektomie eine Indikation zur adjuvanten Strahlentherapie, stimmten die St.-Gallen-Panelisten mehrheitlich dafür, zusätzlich zur Thoraxwand die regionalen Lymphknoten – ohne Mammaria-interna-Lymphabflussgebiet – zu bestrahlen. Ein Drittel der Panelisten enthielt sich allerdings dem Votum.

Laut AGO-Empfehlung kann – entsprechend den Daten der EORTC-Studie von Poortmans et al. [11] – eine adjuvante Bestrahlung der Mammaria-interna-Lymphabflussregion bei Karzinomen im Stadium pN1–2 mit positivem Hormonrezeptor in Erwägung gezogen werden, wenn bei insgesamt hohem Risiko eine adjuvante Chemotherapie erfolgt ist (LoE 1 b<sup>abstract</sup> B+). Bei pN0-Patientinnen mit zentral bzw. medial gelegenen Karzinom und erhöhtem Risiko ist dies eine Einzelfallentscheidung, die individuell getroffen werden muss (AGO-Empfehlung 2015: LoE 1b B±). Eine adjuvante Bestrahlung der Mammaria-interna-Lymphknotenregion sollte laut AGO-Empfehlung bei kardialem Risiko oder Trastuzumab-Therapie nicht durchgeführt werden [2].

Das St.-Gallen-Panel empfiehlt bei Brustrekonstruktion eine Bestrahlung der Thoraxwand und der regionalen Lymphabflusswege (ohne Mammaria-interna-Lymphknoten postoperativ). Die deutsche Arbeitsgruppe weist darauf hin, dass die Indikation zur adjuvanten Bestrahlung nach Möglichkeit vor der Rekonstruktion abgeklärt werden muss. Dies gilt aus deutscher Sicht unter Berücksichtigung der Tumorbologie. Insbesondere bei nodal negativen Patientinnen bzw. jenen mit 1–3 befallenen Lymphkno-

**Tab. 3** Eignung der Multigenexpressions-Testungen für prognostische und prädiktive Aussagen beim luminalen Mammakarzinom nach Einschätzung der St.-Gallen-Panelisten ([1], mod. durch H. H. Kreipe, Hannover) (PAM 50 ROR: PAM 50 risk of recurrence). In Klammern sind die St.-Gallen-Voten in Prozent der Ja-Stimmen angegeben.

| Genexpressionstest bei luminalen Mammakarzinomen: St.-Gallen-Konsens 2015             |                         |                       |                       |                              |
|---------------------------------------------------------------------------------------|-------------------------|-----------------------|-----------------------|------------------------------|
|                                                                                       | Testname/% Befürwortung | < 5 Jahre<br>Prognose | > 5 Jahre<br>Prognose | Chemotherapie-<br>Indikation |
| Prediction Analysis of Microarrays 50 (PAM 50) – Risk of Recurrence (ROR) (Prosigna®) |                         | 92% <sup>1</sup>      | 63% <sup>1</sup>      | 38% <sup>3</sup>             |
| Recurrence Score (Oncotype Dx®)                                                       |                         | 83% <sup>1</sup>      | 44% <sup>3</sup>      | 80% <sup>1, 2</sup>          |
| Endopredict®                                                                          |                         | 70% <sup>1</sup>      | 38% <sup>3</sup>      | 38%                          |
| MammaPrint®                                                                           |                         | 81% <sup>1</sup>      | 33% <sup>3</sup>      | 30% <sup>3</sup>             |

Zustimmung mit folgenden Einschränkungen: <sup>1</sup> Sollte nur bei ausgewählten Patienten eingesetzt werden, wenn alle anderen Kriterien keine klinische Entscheidungsfindung erlauben. <sup>2</sup> Validierte klinische Daten nur für diesen Assay verfügbar. <sup>3</sup> Die wiedergegebene Meinung weicht z. T. deutlich von der Evidenzlage ab (siehe AGO).

ten muss dies sorgfältig abgewogen und mit der Patientin besprochen werden. Zum einen besteht durch die Bestrahlung auf das Implantat ein erhöhtes Risiko für eine Kapselbildung, zum anderen sind bei vorangegangener Thoraxwandbestrahlung spätere Komplikationen nach Rekonstruktion deutlich häufiger. Darüber hinaus stimmt die deutsche Arbeitsgruppe dem Mehrheitsvotum der St.-Gallen-Panelisten zu, dass sich nach neoadjuvanter Chemotherapie (NACT) die Indikation für eine postoperative Bestrahlung am initialen Tumorstadium – vor NACT – orientiert, u. a. unter Berücksichtigung eines histologisch durch Stanzbiopsie verifizierten Lymphknotenbefalls oder positiven Sentinel-Lymphknoten. Die deutsche Expertengruppe weist auf die Notwendigkeit von Studien mit einer reduzierten Bestrahlung der Thoraxwand und der Lymphabflusswege hin. Dies gilt vor allem für Patientinnen, die auf eine NACT gut angesprochen haben und auch in den Lymphknoten eine pathologische Komplettremission zeigen (sog. „Downstaging“). Diese Situation ist im klinischen Alltag sehr häufig (vor NACT: pN+; nach NACT: ypN0).

### Pathologie im Fokus

Die Subtypen Luminal A bzw. Luminal B (HER2-negativ) lassen sich im klinischen Alltag in der Regel über den Östrogen-(ER-) und Progesteronrezeptor-(PR-)Status sowie den Proliferationsmarker Ki-67 voneinander abgrenzen. Die Hormonrezeptor-(HR-) und Ki-67-Bestimmung sollte jeweils in einem qualitätsgesicherten Labor erfolgen. Für die Ki-67-Bestimmung sollten bei lokaler Testung die Laborstandards bekannt sein. Wird Ki-67 als Unterscheidungskriterium herangezogen, fordert ein Teil der St.-Gallen-Panelisten (36,4%) einen Ki-67-Wert von mindestens 20–29% als Cut-off für ein Luminal-B-Karzinom. Die deutsche Arbeitsgruppe weist darauf hin, dass bei Mammakarzinomen vom Luminal-A-Subtyp der Ki-67-Wert mit hoher Wahrscheinlichkeit  $\leq 10\%$  liegt, auch wenn ein verbindlicher Cut-off-Wert bis dato nicht konsentiert ist. Eine Unsicherheit hinsichtlich der Zuordnung und der daraus folgenden therapeutischen Konsequenzen besteht v. a. bei mittleren Ki-67-Werten zwischen 10 und 30%. Die Risikostratifizierung mittels Multigenexpressions-Testung kann **derzeit** die immunhistochemische Bestimmung des intrinsischen Subtyps nicht ersetzen, aber in unklaren Fällen ergänzen. Einigkeit besteht auch darüber, dass für die Unterscheidung zwischen einem Mammakarzinom vom Luminal-A- und Luminal-B-Typ (HER2-negativ) nur in unklaren Fällen z. B. mit intermediärem Ki-67 zwischen 10–35% eine Multigenexpressions-Testung hilfreich sein kann ist.

Beim tripel-negativen bzw. HER2-positiven Mammakarzinom wird **derzeit** die Bedeutung tumorinfiltrierender Lymphozyten diskutiert. Das Ausmaß der Lymphozyteninfiltration eignet sich laut Mehrheitsvotum der St.-Gallen-Panelisten weder als prognostischer noch als prädiktiver Marker. Die deutsche Arbeitsgruppe stimmt hier zu. Allerdings weisen neue Forschungsergebnisse darauf hin, dass die tumorinfiltrierenden Lymphozyten in Zukunft prädiktive und möglicherweise therapierelevante Bedeutung haben werden [12].

### Stellenwert von Multigenexpressions-Signaturen

Bei Patientinnen mit hormonsensiblen primärem Mammakarzinom stellt sich im klinischen Alltag immer wieder die Frage, ob die Patientinnen vor der endokrinen Behandlung eine Chemotherapie benötigen. Das St.-Gallen-Panel hat über den prognostischen und prädiktiven Wert der derzeit verfügbaren Multigen-Assays einzeln abgestimmt: OncotypeDX® Recurrence Score (RS), MammaPrint 70® (MP), Prosigna® PAM 50 Risk of Recurrence (ROR), EndoPredict® (EP) und Breast Cancer Index (BCI). Mit unterschiedlicher Mehrheit von 58,3 bis 92,9% sehen die St.-Gallen-Panelisten in den Multigen-Assays (RS, ROR, EP) eine Möglichkeit, bei Patientinnen mit ER-positivem/HER2-negativem Mammakarzinom prognostisch relevante Informationen für die nächsten 5 Jahre zu erhalten. Mehrheitlich sind die Panelisten jedoch nicht der Ansicht, dass die Assays auch über 5 Jahre hinaus prognostisch relevante Aussagen machen. Ein positives Mehrheitsvotum (63,2%) gab es hier nur für den ROR Score; der EP-Test erreichte ein zustimmendes Votum von 40% der Panelisten. Das deutsche Expertengremium weist darauf hin, dass es für EP und ROR gleichermaßen valide Daten für die Abschätzung des Rezidivrisikos von HR-positiven postmenopausalen Patientinnen über das Jahr 5 nach Erstdiagnose hinaus gibt. Eine verlässliche prädiktive Aussagekraft für eine zusätzliche adjuvante Chemotherapie bescheinigen die St.-Gallen-Panelisten mehrheitlich (80,5%) nur dem Oncotype DX. Bis dato liegen für keinen Multigen-Assay prospektive Studiendaten vor, die ihre prädiktive Bedeutung belegen; für Oncotype DX gibt es hier lediglich retrospektive Daten [2]. Grundsätzlich empfehlen die Panelisten bei Patientinnen mit nodal negativen Karzinomen (HR-positiv, HER2-negativ) bei Unklarheit, ob eine Chemotherapie indiziert ist, zusätzlich Ki-67 zu bestimmen oder eine Multigen-Testung durchzuführen. Aus deutscher Sicht ist eine Multigen-Testung nur gerechtfertigt, wenn die Indikation zu einer Chemotherapie aufgrund der histopathologischen Befunde nicht zweifelsfrei gestellt werden kann. Die Stellungnahme des St.-Gallen-Komitees zum klinischen Nutzen der genannten Multigen-Assays ist in **Tab. 3**

zusammengefasst. Die deutsche Arbeitsgruppe weist darauf hin, dass die von der AGO bewertete Evidenzlage z.T. von der des St.-Gallen-Panels deutlich abweicht [2].

## Endokrine Behandlung

Die zur Abstimmung gestellten Fragen zur endokrinen Therapie des hormonsensiblen Mammakarzinoms fokussieren auf den zusätzlichen Einsatz der ovariellen Funktions-suppression (OFS: ovarian function suppression) bei prämenopausalen Patientinnen sowie die endokrine Therapiedauer.

### Zusätzliche OFS für die prämenopausale Patientin?

Vor dem Hintergrund der aktuellen Daten der SOFT-Studie [13] waren sich die St.-Gallen-Panelisten und die deutsche Arbeitsgruppe einig, dass die zusätzliche OFS (GnRHa, bilaterale Adnex-Exstirpation, bilaterale Bestrahlung der Ovarien) eine Option für junge ( $\leq 35$  Jahre) prämenopausale Patientinnen ist, die nach (neo)adjuvanter Chemotherapie prämenopausale Östrogen-Serumwerte aufweisen. Die deutsche Arbeitsgruppe weist jedoch darauf hin, dass „prämenopausal“ in der SOFT-Studie definiert war als Wiedereinsetzen der Menstruation bzw. Nachweis prämenopausaler Östradiol-Serumwerte innerhalb von 8 Monaten nach Abschluss der (neo)adjuvanten Chemotherapie. Welche endokrine Therapie eingesetzt wird, müsse dann risikoadaptiert und unter Berücksichtigung möglicher Nebenwirkungen entschieden werden. Das potenzielle Nebenwirkungsspektrum muss mit der Patientin besprochen werden. Die Kombination aus Aromatasehemmer bzw. Tamoxifen mit einer OFS hat deutlich mehr Nebenwirkungen als Tamoxifen allein, z. B. Libidoverlust, Gelenksbeschwerden, Osteoporose, Stimmungsschwankungen, Depressionen, kognitive Störungen etc. Darüber muss sorgfältig aufgeklärt werden.

Darüber hinaus sehen die St.-Gallen-Panelisten mehrheitlich auch dann eine Indikation für die zusätzliche OFS, wenn 4 oder mehr Lymphknoten befallen sind (89,7%), wenn ein G3-Karzinom vorliegt (55,9%) und wenn eine Multigen-Testung auf ein erhöhtes Risiko hindeutet (60%). Die deutsche Arbeitsgruppe stimmt hier jeweils nicht zu. Grading, Lymphknotenbefall und Multigen-Test-Ergebnis sind aus deutscher Sicht nicht als Faktoren ausreichend, eine Indikation für eine zusätzliche OFS zu rechtfertigen, da es dafür keine prospektiven Daten gibt. Die deutsche Arbeitsgruppe sieht in diesen Situationen eher eine Indikation für eine Chemotherapie.

Besteht die Indikation für eine zusätzliche OFS, stellt sich die Frage, ob diese zusätzlich zu Tamoxifen oder zu einem Aromatasehemmer eingesetzt wird. Die St.-Gallen-Panelisten votierten mehrheitlich für die Kombination mit einem Aromatasehemmer bei jungen Frauen ( $\leq 35$  Jahre: 59,4%), bei 4 oder mehr befallenen Lymphknoten (92,5%), einem erhöhten Risiko laut Multigen-Testung (65,8%) sowie – mit knapper Mehrheit (57,1%) – bei Vorliegen eines G3-Karzinoms. Bei Patientinnen, die nach abgeschlossener adjuvanter Chemotherapie prämenopausal bleiben, sprach sich eine knappe Mehrheit (51,2%) gegen den Aromatasehemmer als Kombinationspartner aus.

Die deutsche Arbeitsgruppe stimmt keinem dieser Voten zu und verweist darauf, dass sich die abgestimmten Fragen auf eine retrospektive Auswertung der SOFT-Studie [13] beziehen, die in der Vollpublikation nicht so detailliert beschrieben ist. Für die SOFT-Studie liegen keine Daten zum Gesamtüberleben vor. Auch wenn die Patientenkollektive nicht ganz identisch und damit nur

eingeschränkt vergleichbar sind (adjuvante Chemotherapie 10 vs. ca. 50%), stehen die Daten der SOFT/TEXT-Studie im Widerspruch zur österreichischen ABCSG12-Studie [14]. Hier hatte sich nach einer medianen Nachbeobachtungszeit von 9,4 Jahren eher ein Nachteil für das Überleben (HR 1,63; 95%-KI 1,05–1,45;  $p=0,030$ ) für die Patientinnen ergeben, die mit Anastrozol und GnRH 3 Jahre behandelt wurden, verglichen mit Tamoxifen und GnRH-Analoga. Die deutsche Arbeitsgruppe empfiehlt, die Entscheidung, ob die OFS ggf. mit Tamoxifen oder einem Aromatasehemmer kombiniert werden sollte, nach sorgfältiger Aufklärung der Patientin individuell unter Abwägung von Nutzen und Risiko sowie den Nebenwirkungen zu treffen.

Die St.-Gallen-Panelisten votierten mit knapper Mehrheit (56,7%) dafür, die OFS über 5 Jahre durchzuführen. Die deutsche Arbeitsgruppe schränkt dies ein und empfiehlt primär 2–3 Jahre und in Abhängigkeit von Nebenwirkungen und Risiken eine maximale OFS-Dauer von 5 Jahren. Wird ein Aromatasehemmer gegeben, z. B. bei absoluten Kontraindikationen gegen Tamoxifen, muss er in der Prämenopause immer mit OFS kombiniert werden.

### Postmenopausale Patientin

Einig sind sich die St.-Gallen-Panelisten und die deutsche Arbeitsgruppe, dass die Behandlung mit Tamoxifen nach wie vor eine adäquate Option für postmenopausale Patientinnen mit hormonsensiblen Mammakarzinom ist. Ein Aromatasehemmer ist jedoch bei erhöhtem Risiko zu bevorzugen, z. B. bei 4 und mehr befallenen Lymphknoten oder einem G3-Karzinom plus hohem Ki-67-Wert oder bei Nachweis einer HER2-Überexpression. Das Alter der Patientin spielt für die Entscheidung, ob Tamoxifen oder ein Aromatasehemmer eingesetzt wird, keine Rolle. Ist ein Aromatasehemmer indiziert, sollte er bei erhöhtem Risiko „upfront“ gegeben werden. Der „Switch“ zu Tamoxifen nach 2 Jahren ist eine Option bei schlechter Verträglichkeit. Die Frage, ob der Aromatasehemmer bei Patientinnen mit einem lobulären Karzinom – im Vergleich zum duktalem Karzinom – bevorzugt werden sollte, wurde vom St.-Gallen-Panel nicht gestellt. Die deutsche Expertengruppe spricht sich mit Verweis auf die ATAC- und die BIG-1–98-Daten beim lobulären Karzinom klar für die Therapie mit einem Aromatasehemmer aus [15, 16].

### Therapiedauer über 10 Jahre?

Die erweiterte endokrine Behandlung über insgesamt 10 Jahre ist eine wichtige Option bei erhöhtem Risiko sowohl für prä- als auch postmenopausale Patientinnen mit hormonsensiblen Mammakarzinom. Laut St.-Gallen-Votum ist unabhängig vom Menopausenstatus für Patientinnen mit Lymphknotenbefall bzw. einem G3-Karzinom plus hohem Ki-67-Wert nach 5 Jahren adjuvanter Tamoxifen-Behandlung in der Prämenopause eine Fortführung mit Tamoxifen für weitere 5 Jahre sinnvoll. In der Postmenopause wäre entweder die 5-jährige Fortführung mit Tamoxifen oder mit einem Aromatasehemmer eine Option. Die deutsche Arbeitsgruppe stimmt diesem Votum für die Patientinnen mit Lymphknotenbefall zu und empfiehlt für prämenopausale Patientinnen Tamoxifen und für postmenopausale Patientinnen Tamoxifen oder einen Aromatasehemmer. Weitere Faktoren wie Grading und Ki-67 sind dagegen wenig validiert bez. eines erhöhten Rezidivrisikos nach 5 Jahren endokriner Therapie. Eine endokrine Weiterbehandlung ist daher aus deutscher Sicht bei diesen Faktoren eine individuelle Entscheidung. Dies gilt unabhängig vom Menopausenstatus der Patientin.

Eine nur relative Indikation für die endokrine Weiterbehandlung über 5 Jahre hinaus besteht unabhängig vom Menopausenstatus bei Patientinnen ohne Lymphknotenbefall. Patientinnen, die bei Therapiebeginn prämenopausal sind und im Therapieverlauf postmenopausal geworden sind, sollten dagegen bei erhöhtem Rezidivrisiko auch nach 5-jähriger Tamoxifen-Therapie endokrin weiterbehandelt werden.

### Erweiterte endokrine Behandlung

Besteht bei Patientinnen, die adjuvant 2 Jahre Tamoxifen, gefolgt von 3 Jahren Aromatasehemmer erhalten haben, die Indikation für eine erweiterte endokrine Therapie (> 5 Jahre), votierten die St.-Gallen-Panelisten mehrheitlich dafür, diese Patientinnen entweder für weitere 5 Jahre mit Tamoxifen oder für weitere 2 Jahre mit einem Aromatasehemmer zu behandeln. Die deutsche Arbeitsgruppe stimmt dem zu. Sie weist aber darauf hin, dass sowohl die 2-jährige Weiterbehandlung mit einem Aromatasehemmer, als auch 5 weitere Jahre Tamoxifen klinisch sinnvoll sein können, auch wenn es für beide Strategien keine gesicherten Daten gibt bzw. keine Daten zu einem direkten Vergleich beider Strategien vorliegen. Keine Evidenz besteht hingegen derzeit für die Gabe eines Aromatasehemmers über den Zeitraum von 5 Jahren hinaus [17]. In Einzelfällen kann hier jedoch eine individuell zu begründende Entscheidung mit der Patientin getroffen werden.

Wurde eine postmenopausale Patientin adjuvant „upfront“ über 5 Jahre mit einem Aromatasehemmer behandelt und soll über weitere 5 Jahre endokrin behandelt werden, muss dies individuell entschieden werden, da es hierzu ebenfalls bislang keine Daten basierend auf kontrollierten Studien gibt. Das Abstimmungsergebnis des St.-Gallen-Panels war hier nicht eindeutig: Mit jeweils knapper Mehrheit wurde sowohl die Weiterbehandlung mit Tamoxifen als auch mit einem Aromatasehemmer abgelehnt. Mit 54,5% stimmte eine knappe Mehrheit dafür, keine weitere endokrine Therapie bei diesen Patientinnen durchzuführen.

Die deutsche Expertengruppe stimmt allen 3 Mehrheiten-Voten zu mit dem Verweis darauf, dass es sich hier um Einzelfallentscheidungen handelt, die in Abhängigkeit von Nutzen und Risiko bzw. Verträglichkeit und Tumorlast getroffen werden sollten. Grundsätzlich besteht Einigkeit dahingehend, dass Patientinnen, die eine Behandlung mit einem Aromatasehemmer nicht vertragen und (wieder) auf Tamoxifen umgestellt wurden, Tamoxifen länger als 5 Jahre erhalten können. Generell sollte bei Nebenwirkungen unter einer endokrinen Therapie ein frühzeitiger Wechsel erfolgen, da jede Form der endokrinen Therapie besser ist als ein Therapieabbruch.

### Adjuvante Chemotherapie im Fokus

#### ▼ Luminal-A-Mammakarzinome

Luminal-A-Mammakarzinome sind definiert als Mammakarzinome mit hoher Hormonrezeptor-(HR-)Expression, HER2-Negativität und geringer Proliferationsrate. Vor diesem Hintergrund stellt die endokrine Intervention die Therapie der Wahl dar. Darüber hinaus besteht grundsätzlich Einigkeit dahingehend, dass eine zusätzliche adjuvante Chemotherapie in der Regel nicht indiziert ist und nur bei erhöhtem Risiko individuell unter Abwägung von Nutzen und Nebenwirkungen eingesetzt werden sollte. Eine relative Indikation für eine zusätzliche adjuvante Chemotherapie bei Patientinnen mit Luminal-A-Mammakarzinom kann z. B. bei hoher Tumorlast ( $\geq 4$  befallene Lymphknoten, T3) bestehen.

Keine Indikation für eine zusätzliche adjuvante Chemotherapie sehen die deutschen und internationalen Experten bei 1–3 befallenen Lymphknoten ohne zusätzliche Risikofaktoren. Das gilt aus deutscher Sicht auch für Patientinnen mit extensiver lymphovaskulärer Tumorinvasion als isoliertem Risikofaktor: Anders als die Mehrheit der St.-Gallen-Panelisten (67,6%) sieht die deutsche Arbeitsgruppe hier ohne zusätzliche Risikofaktoren keine Indikation für eine adjuvante Chemotherapie.

#### Luminal-B-Mammakarzinome ohne HER2-Überexpression

Auch für Patientinnen mit einem Luminal-B-Mammakarzinom ist die endokrine Behandlung ein wichtiger Bestandteil der Systemtherapie. Die St.-Gallen-Panelisten und die deutsche Arbeitsgruppe stimmen überein, dass vor dem Hintergrund des erhöhten Rezidivrisikos in der Regel zusätzlich eine adjuvante Chemotherapie indiziert ist. Besteht eine Chemotherapie-Indikation, sollten bevorzugt anthrazyklin-/taxanhaltige Regime eingesetzt werden, wie z. B. 4 Zyklen Anthrazyklin/Cyclophosphamid (AC), gefolgt von 12 Wochen Paclitaxel wöchentlich oder auch 6 Zyklen Docetaxel/Doxorubicin/Cyclophosphamid, alle 3 Wochen (TAC). Sechs Zyklen eines anthrazyklinhaltigen Regimes (ohne Taxan) hingegen werden als obsolet angesehen. Bei hohem Rezidivrisiko (z. B.  $\geq 4$  befallene Lymphknoten) sind dosisdichte Regime mit G-CSF-Support eine Therapieoption.

Bei niedrigen Score-Werten der derzeit verfügbaren Multigenexpressions-Tests (RS, MP, PAM50 ROR, EP) kann bei Patientinnen mit bis zu 3 befallenen Lymphknoten auf eine adjuvante Chemotherapie verzichtet werden. Die ersten prospektiven Daten der Plan-B-Studie (HR+, HER2-) zeigen bei Patientinnen mit 0–3 befallenen Lymphknoten und niedrigem RS ( $\leq 11$ ) ein exzellentes 3-Jahres-Überleben von über 98% [18]. Ein intermediärer RS ist derzeit nicht aussagekräftig und bietet keine Entscheidungsgrundlage. Die deutsche Arbeitsgruppe verweist auf die laufenden Studien (TailorX, RxPONDER, MINDACT, PlanB, ADAPT), deren Ergebnisse abgewartet werden müssen.

#### Tripel-negatives Mammakarzinom

Für Patientinnen mit duktalem tripel-negativem Mammakarzinom (TNBC: ER-, PR-, HER2-) stellen die etablierten anthrazyklin-/taxanhaltigen Regime die Therapie der Wahl dar. Das gilt auch für Patientinnen mit BRCA-Mutation. Dosisdichte Regime (mit G-CSF-Support) können hier nach Ansicht der Panelisten ebenfalls eine Option sein (ja 45%; nein 52,5%). Die deutsche Arbeitsgruppe stimmt hier dem jeweiligen Mehrheitsvotum der St.-Gallen-Panelisten zu. Die Mehrheit der St.-Gallen-Panelisten (92,9%) und die deutsche Arbeitsgruppe sind außerdem einig, dass platinhaltige Regime beim TNBC nicht generell indiziert sind. Eine knappe Mehrheit der St.-Gallen-Panelisten (57,9%) sieht jedoch eine Indikation für Platin bei Patientinnen mit TNBC und BRCA-Mutation. Dem Einsatz platinhaltiger Regime beim TNBC in der adjuvanten Situation stimmt die deutsche Arbeitsgruppe *nicht* zu, da derzeit keine Daten vorliegen, die den adjuvanten Einsatz eines platinhaltigen Regimes rechtfertigen. Die deutsche Arbeitsgruppe empfiehlt für diese Patientinnen jedoch eine neoadjuvante Therapie und wenn möglich die Teilnahme an klinischen Studien, die sich dieser Fragestellung widmen.

#### HER2-positives Mammakarzinom

Ist eine HER2-Positivität nach den Vorgaben der ASCO/CAP-Richtlinien [19] nachgewiesen, besteht schon ab dem Tumorstadium T1b in der Regel eine Indikation für eine adjuvante anti-

**Tab. 4** Auswahl positiver Studien zur neoadjuvanten Behandlung mit Platin [2] (pCR: pathologische Komplettremission; NPLD: nicht pegyliertes Doxorubicin; TNBC: triplel-negatives Mammakarzinom; Cb: Carboplatin; qw: wöchentlich; q3w: alle 3 Wochen; FEC: 5-Fluorouracil, Epirubicin, Cyclophosphamid; CALGB: Cancer and Leukemia Group B).

| Autor                       | Studie                  | Regime                                                                                                                              | pCR-Rate                                 |
|-----------------------------|-------------------------|-------------------------------------------------------------------------------------------------------------------------------------|------------------------------------------|
| Sikov WM et al. [21]        | CALGB 40603<br>Phase II | Paclitaxel 80 mg/m <sup>2</sup> qw × 12 +<br>Carboplatin AUC 6 q3w × 4 – dd AC q2w × 4                                              | TNBC ± Cb: 54 vs. 41 %<br>(ypT0/is ypN0) |
| von Minckwitz G et al. [22] | Gepar Sixto<br>Phase II | NPLD 20 mg/m <sup>2</sup> qw × 18 + Paclitaxel 80 mg/m <sup>2</sup> qw × 18 ±<br>Carboplatin AUC 1,5 qw × 18 + Bev 15 mg/kg q3w × 6 | TNBC ± Cb: 53 vs. 37 %<br>(ypT0 ypN0)    |
| Ando M et al. [23]          | Phase II                | Paclitaxel 80 mg/m <sup>2</sup> qw × 12 +<br>Carbo-plat AUC 5 q3w × 4 – FEC q3w × 4                                                 | TNBC ± Cb:<br>61 vs. 26 %                |

HER2-gerichtete Behandlung – so das Mehrheitsvotum der St.-Gallen-Panelisten (81,4%), dem die deutsche Arbeitsgruppe zustimmt. Ab Stadium T1c und größer votierten alle St.-Gallen-Panelisten für die adjuvante Chemotherapie in Kombination mit einer anti-HER2-zielgerichteten Therapie.

Die adjuvante Chemotherapie sollte vorzugsweise aus einem sequenziellen anthrazyklin-/taxanhaltigen Regime bestehen; die anti-HER2-gerichtete Therapie wird parallel zum Taxan eingesetzt. Bei Patientinnen mit nodal negativem T1b/c-Karzinom kann auch die Kombination 12 × Paclitaxel „wöchentlich“ plus Trastuzumab (1 Jahr) (ohne Anthrazyklin) eine sinnvolle Therapieoption sein.

Substanz der Wahl für die adjuvante anti-HER2-gerichtete Behandlung ist der monoklonale Antikörper Trastuzumab. Mangels Zulassung besteht derzeit adjuvant weder eine Indikation für die doppelte Antikörperblockade mit Trastuzumab/Pertuzumab noch die duale Blockade mit Trastuzumab/Lapatinib.

## Neoadjuvante Behandlung im Fokus

### HER2-positives Mammakarzinom

Einigkeit besteht darüber, dass auch für die neoadjuvante Behandlung des HER2-positiven Mammakarzinoms sequenzielle anthrazyklin-/taxanbasierte Chemotherapie-Regime plus Trastuzumab die Therapie der Wahl sind. Die deutsche Arbeitsgruppe stimmt dem Mehrheitsvotum der St.-Gallen-Panelisten *nicht* uneingeschränkt zu, die eine neoadjuvante Indikation von Pertuzumab in Kombination mit Trastuzumab und einem Taxan sehen (73%). Das St.-Gallen-Votum dürfte dem hohen Anteil der US-amerikanischen Panelmitglieder geschuldet sein: Pertuzumab/Trastuzumab/Taxan ist in den USA im Gegensatz zu Europa für die neoadjuvante Behandlung des HER2-positiven Mammakarzinoms zugelassen. Ohne Zulassung kann die duale Blockade mit Pertuzumab in der neoadjuvanten Situation in Deutschland nur eine Einzelfallentscheidung sein. Die deutsche Arbeitsgruppe weist darauf hin, dass für Patientinnen mit kardialen Risiko das anthrazyklinfreie TCH-Regime (Docetaxel, Carboplatin, Trastuzumab) eine neoadjuvante Therapieoption darstellt.

### Tripel-negatives Mammakarzinom

Das neoadjuvante Therapiekonzept ist eine wichtige Grundlage für Patientinnen mit TNBC. Indiziert sind sequenzielle Regime mit einer Anthrazyklinkombination gefolgt von einem Taxan. Die inverse Sequenz erreicht mindestens vergleichbare Ansprechraten. Die Ergebnisse der GeparSepto-Studie [20] zeigen eine signifikant höhere pCR-Rate mit nab-Paclitaxel verglichen mit Paclitaxel – jeweils gefolgt von 4 Zyklen Epirubicin/Cyclophosphamid (EC), alle 3 Wochen. Für die TNBC-Patientinnen

wurde durch nab-Paclitaxel eine Verdopplung der pCR-Rate erreicht. Weitere Studienergebnisse (ETNA, ADAPT) werden auf den kommenden großen internationalen Kongressen vorgestellt. Das St.-Gallen-Panel empfiehlt für die neoadjuvante Behandlung beim TNBC keine Platinderivate. Dies wird vom deutschen Expertengremium anders bewertet. Daten aus mehreren prospektiv randomisierten neoadjuvanten Studien [21–23] zeigen einen eindeutigen Vorteil von Platin, insbesondere bei Patientinnen mit einer familiären Belastung bzw. BRCA-Mutationen (● Tab. 4), weshalb die AGO eine einfache (Plus-)Empfehlung vergeben hat [2].

### Luminal-A-Mammakarzinom

Bei den hormonsensiblen Luminal-A-Mammakarzinomen ist die neoadjuvante Chemotherapie derzeit keine Option. Die deutsche Arbeitsgruppe stimmt damit dem Mehrheitsvotum der St.-Gallen-Panelisten *nicht* zu, welche in der neoadjuvanten Chemotherapie eine Option für diese Patientinnen sehen, wenn eine brusterhaltende Operation *nicht* möglich ist. Die deutsche Arbeitsgruppe weist darauf hin, dass bei Patientinnen mit Luminal A Mammakarzinom selten eine Indikation für eine neoadjuvante Chemotherapie besteht, da aufgrund der geringen Chemotherapie-Sensitivität eine Tumorverkleinerung (pCR) und damit auch eine bessere Operabilität bzw. eine Prognoseverbesserung unwahrscheinlich erscheint.

Die neoadjuvante *endokrine* Behandlung kann dagegen eine sinnvolle Option für postmenopausale Patientinnen mit hoch hormonsensiblen Mammakarzinom sein. Diesem Mehrheitsvotum der St.-Gallen-Panelisten stimmt die deutsche Arbeitsgruppe zu, schränkt aber ein, dass die neoadjuvante endokrine Therapie aufgrund der limitierten Datenlage nur für ältere Patientinnen mit klinisch relevanten internistischen Komorbiditäten (multimorbide Patientinnen) infrage kommt, was individuell zu entscheiden ist. Darüber hinaus besteht die Option, Patientinnen im Rahmen klinischer Studien neoadjuvant endokrin zu behandeln. Wie lange die Patientinnen neoadjuvant endokrin behandelt werden sollten, muss aus deutscher Sicht ebenfalls individuell entschieden werden. Die St.-Gallen-Panelisten empfehlen mehrheitlich, entsprechende Patientinnen entweder über mehrere (4–8) Monate oder bis zum maximalen Ansprechen neoadjuvant endokrin zu behandeln. Die deutsche Arbeitsgruppe weist darauf hin, dass die Patientinnen nach Möglichkeit operiert werden sollten.

### Adjuvanter Einsatz von „bone modifying agents“ (BMA: Bisphosphonate, Denosumab)

Der adjuvante Einsatz eines Bisphosphonats (Zoledronsäure alle 6 Monate oder orales Clodronat täglich) zusätzlich zur adjuvanten endokrinen Therapie kann eine Option für postmenopausale Patientinnen sein mit dem Ziel, die krankheitsfreie Überlebenszeit zu verlängern. Die deutsche Arbeitsgruppe stimmt hier dem Mehrheitsvotum der St.-Gallen-Panelisten zu. Die Daten einer großen Metaanalyse [24] weisen darauf hin, dass ein positiver Effekt der adjuvanten Bisphosphonate (BP) auf die postmenopausalen Patientinnen beschränkt bleibt. Zu beachten ist, dass eine Zulassung für BP nur zur Behandlung der Osteoporose sowie osärer Metastasen besteht.

Das gilt nicht für prämenopausale Patientinnen – unabhängig davon ob diese zusätzlich zu Tamoxifen ein GnRH-Analogon erhalten oder nicht. Die deutsche Arbeitsgruppe stimmt dem Mehrheitsvotum der St.-Gallen-Panelisten zu. Mit Verweis auf die Daten der österreichischen ABCSG-12-Studie [13] kann aus deutscher Sicht die adjuvante Bisphosphonatgabe in der Prämenopause bei zusätzlicher GnRH-Gabe im Einzelfall eine Option sein, ist aber keinesfalls genereller Standard. Einigkeit besteht dahingehend, dass keine Indikation für den adjuvanten Einsatz von Denosumab besteht – hierzu fehlen derzeit noch die entscheidenden Daten.

### Ältere und jüngere Patientinnen im Fokus

Einigkeit besteht, dass der Einsatz einer adjuvanten Standard-(Chemo-)Therapie bei Patientinnen ohne klinisch relevante (signifikante) Komorbiditäten nicht vom Alter per se abhängig ist. Das gilt auch für die Frage, ob bei einer postmenopausalen Patientin mit östrogenrezeptorpositivem Mammakarzinom nach brusterhaltender Operation auf eine adjuvante Bestrahlung verzichtet werden kann, vorausgesetzt dass die Patientin endokrin weiter behandelt wird. In beiden Fällen spielt das Alter per se eine untergeordnete Rolle für die Therapieentscheidung, sodass kein absolutes Alterslimit genannt werden kann. Die Indikation zu einer adjuvanten Therapie sollte sich an der Lebenserwartung (biologisches Alter) orientieren.

Bei Patientinnen mit einem TNBC unter 40 Jahren stimmte die deutsche Arbeitsgruppe dem Mehrheitsvotum aus St. Gallen zu, dass bei diesen Patientinnen eine humangenetische Beratung sowie eine BRCA1/2-Testung erfolgen sollten (73%). Bei der Zusatzfrage, ob dies auch gilt, wenn die Altersgrenze auf < 60 Jahre angehoben wird, stimmte das St.-Gallen-Panel mit einem 50%-Votum ab. Ein klares Votum zugunsten der Testung gab es für Patientinnen mit TNBC und positiver Familienanamnese (90,9%). Die deutsche Arbeitsgruppe stimmt hier jeweils zu und verweist auf die neue AGO-Therapieempfehlung 2015, in der für dieses Patientinnenkollektiv eine genetische Testung empfohlen wird. Die weitere Mutationstestung in anderen Genen lehnte das St.-Gallen-Panel mit knapper Mehrheit (50%) ab. Die deutsche Arbeitsgruppe stimmt dem mehrheitlich zu.

Die St.-Gallen-Panelisten und die deutsche Arbeitsgruppe sind sich einig, dass eine Testung auf andere Hochrisiko-Mutationen (z.B. PALB2) nicht generell bei allen Mammakarzinom-Patientinnen sinnvoll ist, wohl aber bei positiver Familienanamnese und Patientinnen ≤ 35 Jahre zu empfehlen ist. Keine generelle Indikation für eine Testung besteht bei Patientinnen < 50 Jahre, laut Mehrheitsvotum in St. Gallen wohl aber für jene mit einem ER-

negativen und HER2-negativen Mammakarzinom (70%). Die deutsche Arbeitsgruppe stimmt zu, sieht eine Testung aber nur dann als sinnvoll an, wenn diese therapeutische Relevanz hat bzw. sich daraus operative Konsequenzen ergeben, wie z.B. die Empfehlung zu einer prophylaktischen Mastektomie bzw. einer Adnexektomie bei Vorliegen einer BRCA-Mutation. Aus deutscher Sicht sollte die Testung bei Patientinnen mit ER- und HER2-negativem Mammakarzinom generell – unabhängig vom Alter der Frau – durchgeführt werden, wenn das Ergebnis Einfluss auf die Therapieentscheidung hat. Mit steigendem Alter sinkt die Wahrscheinlichkeit für einen Mutationsnachweis. Das gilt aus deutscher Sicht auch bei Patientinnen mit „basal-like“ Mammakarzinom. Das St.-Gallen-Panel hatte hier jeweils restriktiver abgestimmt. Einigkeit bestand, dass der Nachweis einer BRCA1/2-Mutation nur die neoadjuvante Therapie beeinflussen kann, jedoch mangels Daten keinen Einfluss auf die adjuvante Therapieentscheidung hat.

Einigkeit besteht auch, dass jungen Patientinnen ein Fertilitätserhalt angeboten werden sollte. Hier kann der Einsatz von GnRH-Analoga eine Option sein. Die deutsche Arbeitsgruppe stimmt der diesbezüglichen Beratung junger Frauen zu, weist aber darauf hin, dass die Datenlage kontrovers ist. Bei der Entscheidung sind auch potenzielle Nebenwirkungen zu beachten.

Die St.-Gallen-Panelisten votierten mehrheitlich (78,9%) dafür, den jungen Patientinnen (< 40 Jahre) mit HR-negativem Mammakarzinom zusätzlich zur Chemotherapie die Suppression der Ovarfunktion (OFS) anzubieten. Die deutsche Arbeitsgruppe hat dies intensiv diskutiert und kam zu keinem einheitlichen Votum. Mit Verweis auf die aktuellen Therapieleitlinien der AGO Mamma [1] wird daher empfohlen, dies individuell zu entscheiden und mit der Patientin zu besprechen.

### Mammakarzinom und Schwangerschaft

Wird die Diagnose „Mammakarzinom“ während der Schwangerschaft gestellt, sollte die Geburt nicht vorzeitig eingeleitet werden. Eine brusterhaltende Operation ist möglich. Eine Lymphszintigrafie sowie eine SNB können durchgeführt werden. Ist eine endokrine Therapie indiziert, sollte diese erst nach der Geburt begonnen werden. Die deutsche Arbeitsgruppe stimmt dem Mehrheitsvotum der St.-Gallen-Panelisten jeweils zu. Keine Zustimmung gibt die deutsche Arbeitsgruppe zu dem knappen Mehrheitsvotum in St. Gallen (52,6%), dass eine sofortige Rekonstruktion der Brust im Fall der Mastektomie sinnvoll ist. Die deutsche Arbeitsgruppe begründet dies mit der längeren Operationsdauer und dem erhöhten Komplikationsrisiko.

Möchte eine Mammakarzinom-Patientin schwanger werden, kann eine laufende endokrine Behandlung unterbrochen werden. Die St.-Gallen-Panelisten hatten sich mehrheitlich (60,6%) für eine Unterbrechung der endokrinen Therapie erst nach 18–30 Monaten ausgesprochen, so eine Schwangerschaft gewünscht ist, und empfehlen mehrheitlich (61,1%), dies nur dann in Erwägung zu ziehen, wenn kein erkennbar erhöhtes Rezidivrisiko vorliegt.

Die deutsche Arbeitsgruppe betont, dass die Patientin mindestens 18 Monate Tamoxifen erhalten haben sollte, da laut EBCTG-Analyse ab dann der jährliche Zugewinn durch die adjuvante Therapie geringer wird. Die deutsche Arbeitsgruppe weist darauf hin, dass der Benefit der adjuvanten Therapie mit der Therapiedauer korreliert. Dies sollte mit der Patientin besprochen werden. Die Entscheidung, ob und wann die adjuvante endokrine Behandlung mit Blick auf eine Schwangerschaft unterbrochen

wird, hängt von der individuellen Lebenssituation und dem Alter der Patientin ab.

### Mammakarzinom beim Mann

Mammakarzinome beim Mann sind in der Regel hormonsensibel und werden systemisch mit Tamoxifen behandelt. Aromatasehemmer ± LHRH-Analoga sind außerhalb von Studien keine Option.

### Ernährung und körperliche Aktivität

Einigkeit besteht, dass Patientinnen mit Mammakarzinom keine spezielle Ernährungsdiät benötigen. Eine ausgewogene Ernährung ist jedoch für die Gesamtbefindlichkeit und die Gesundheit grundsätzlich sinnvoll. Ein positiver Effekt auf die brustkrebspezifische Überlebensrate ist nicht eindeutig belegt. Regelmäßige körperliche Aktivität und moderater Sport sowie das Vermeiden von deutlichem Übergewicht verbessern signifikant die rezidivfreie Zeit und das Gesamtüberleben. Bei bestehendem Vitamin-D-Mangel wird eine Supplementierung empfohlen.

### Interessenkonflikt

Das Post-St.-Gallen-Treffen wurde von der Firma I-MED-Institute GmbH organisiert und durchgeführt mit einem inhaltlich nicht einschränkenden Grant der Firma Celgene GmbH.

NH erhielt Honoraria von folgenden Firmen: Celgene, Genomic Health, NanoString, Novartis, Roche. JH erhielt Honoraria von folgenden Firmen: Novartis, Celgene, Roche, GSK, Genomic Health und führte Forschung durch mit Unterstützung von GSK. HHK erhielt Honoraria von folgenden Firmen: Roche, Genomic Health, AstraZeneca, Novartis. CL erhielt Honoraria von folgenden Firmen: Genomic Health, Roche, Celgene und führte Forschung durch mit Unterstützung von Eisai. VM erhielt Honoraria von folgenden Firmen: Amgen, Celgene, Roche und führte Forschung durch mit Unterstützung von Amgen. HS erhielt Honoraria von folgenden Firmen: Makosch media, Amgen, Celgene, NanoString. AS erhielt Honoraria von folgenden Firmen: Roche, Celgene, Amgen und führte Forschung durch mit Unterstützung von Roche. CT erhielt Honoraria von folgenden Firmen: Amgen, AstraZeneca, Celgene, Genomic Health, NanoString, Novartis, Pfizer, Roche, Teva. CJ erhielt Honoraria von folgenden Firmen: Travel Grant Celgene. JUB erhielt Honoraria von folgenden Firmen: Roche, Novartis, Pfizer, Celgene, Teva, Amgen und führte Forschung durch mit Unterstützung vom DIZG. PAF erhielt Honoraria von folgenden Firmen: Amgen, Novartis, Roche, Pfizer, Teva, Genomic Health, GSK, NanoString und führte Forschung durch mit Unterstützung von Novartis, Amgen. WJ erhielt Honoraria von folgenden Firmen: Roche, Novartis, Sanofi-Aventis, AstraZeneca, Pfizer, Chugai, Amgen und führte Forschung durch mit Unterstützung von Roche, Novartis, Sanofi-Aventis, AstraZeneca, Pfizer, Chugai, Amgen. HJL erhielt Honoraria von folgenden Firmen: Roche, Novartis, Eisai, Celgene. A. Scharl erhielt Honoraria von folgenden Firmen: Celgene, Roche, Novartis, Teva, Amgen, AstraZeneca, Sanofi, Glaxo, Eisai, Riemsler, Janssen-Cilag. SL führte Forschung durch mit Unterstützung von Celgene, Amgen, Roche, Novartis, Pfizer, Abbott. Alle übrigen Autoren erklären, dass sie keinen Interessenkonflikt haben.

### Anmerkung

Die Verantwortung für die Manuskripterstellung lag ausschließlich bei den Autoren. Für die kritische Durchsicht des Manuskripts danken die Autoren Herrn Professor Diethelm Wallwienner, Direktor der Universitätsfrauenklinik Tübingen. Für die redaktionelle Unterstützung bei der Erstellung des Manuskripts danken die Autoren Frau Birgit-Kristin Pohlmann, Nordkirchen.

### Institute

- <sup>1</sup> Klinik für Gynäkologie und Geburtshilfe, interdisziplinäres Brustzentrum, HELIOS Klinikum Berlin Buch, Berlin
- <sup>2</sup> Brustzentrum, Frauenklinik der Universität München (LMU), München
- <sup>3</sup> Universitätsfrauenklinik Ulm, Brustzentrum, Ulm
- <sup>4</sup> German Breast Group, Neu-Isenburg; Universitäts-Klinikum Frankfurt; Senologische Onkologie, Düsseldorf
- <sup>5</sup> Universitätsfrauenklinik Rostock, Rostock
- <sup>6</sup> Institut für Pathologie, Medizinische Hochschule Hannover, Hannover
- <sup>7</sup> Klinik für Frauenheilkunde und Geburtshilfe, Universitätsklinikum Schleswig-Holstein, Campus Lübeck
- <sup>8</sup> Gemeinschaftspraxis für interdisziplinäre Onkologie und Hämatologie, Freiburg
- <sup>9</sup> Klinik für Gynäkologie und Geburtshilfe, Klinikum Frankfurt-Höchst, Frankfurt/Main
- <sup>10</sup> Klinik und Poliklinik für Strahlentherapie und Radioonkologie, LMU München, München
- <sup>11</sup> Nationales Centrum für Tumorerkrankungen (NCT) und Universitätsfrauenklinik Heidelberg, Heidelberg
- <sup>12</sup> Universitätsklinik und Poliklinik für Gynäkologie, Halle (Saale)
- <sup>13</sup> Klinik für Gynäkologie und Geburtshilfe, Sana-Klinikum Offenbach, Offenbach
- <sup>14</sup> Frauenklinik des Universitätsklinikums Erlangen (Direktor), Comprehensive Cancer Center Erlangen, Erlangen
- <sup>15</sup> Klinik für Gynäkologie und Brustzentrum, Charité Berlin-Mitte, Berlin
- <sup>16</sup> Universitätsfrauenklinik Magdeburg, Magdeburg
- <sup>17</sup> Gemeinschaftspraxis Onkologie, Ravensburg, Ravensburg
- <sup>18</sup> Gemeinschaftspraxis Gynäkologie und Geburtshilfe, Mannheim, Mannheim
- <sup>19</sup> Frauenklinik des Universitätsklinikums Erlangen, Comprehensive Cancer Center Erlangen-Nürnberg, Friedrich-Alexander Universität Erlangen-Nürnberg, Erlangen
- <sup>20</sup> Universitätsfrauenklinik Düsseldorf, Düsseldorf
- <sup>21</sup> Universitätsfrauenklinik Ulm, Ulm
- <sup>22</sup> Gynäkologisch-onkologische Praxis, Hannover, Hannover
- <sup>23</sup> Klinik für Gynäkologie und Geburtshilfe, Universitätsklinikum Schleswig-Holstein, Campus Kiel
- <sup>24</sup> Frauenklinik, Klinikum St. Marien, Amberg
- <sup>25</sup> German Breast Group, Neu-Isenburg; Klinik für Gynäkologie und Geburtshilfe, Sana-Klinikum Offenbach, Offenbach

### Literatur

- 1 Coates AS, Winer EP, Goldhirsch A et al. Tailoring therapies – improving the management of early breast cancer: St Gallen International Expert Consensus on the Primary Therapy of Early Breast Cancer 2015. *Ann Oncol* 2015; DOI: 10.1093/annonc/mdv221
- 2 Online: www.ago-online.de vom 08.04.2015; Stand: 30.04.2015
- 3 Boughey JC, Suman VJ, Mittendorf EA et al. Sentinel lymph node surgery after neoadjuvant chemotherapy in patients with node positive breast cancer: the ACOSOG Z1071 (Alliance) clinical trial. *JAMA* 2013; 310: 1455–1461
- 4 Kühn T, Bauerfeind I, Fehm T et al. Sentinel-lymph-node biopsy with breast cancer before and after neoadjuvant chemotherapy (SENTINA): a prospective multi-center cohort study. *Lancet Oncol* 2013; 14: 609–618
- 5 Boughey JC, Ballman KV, Symmans WF et al. Methods impacting the false negative rate of sentinel lymph node surgery in patients presenting with node positive breast cancer (T0–T4,N1–2) who receive neoadjuvant chemotherapy – Results from a prospective trial – ACOSOG Z1071 (Alliance). *SABCS* 2014; P2-01-02
- 6 Giuliano AE, McCall L, Beitsch P et al. Locoregional recurrence after sentinel lymph node dissection with or without axillary dissection in patients with sentinel node metastases: the American College of Surgeons Oncology Group Z0011 randomized trial. *Ann Surg* 2010; 252: 426–432
- 7 Online: www.astro.org vom 19.03.2015; Stand: 30.04.2015
- 8 Online: www.estro.org (2012); Stand: 30.04.2015

- 9 Smith BD, Arthur DW, Buchholz TA et al. Accelerated partial breast irradiation consensus statement from the American Society for Radiation Oncology (ASTRO). *Int J Radiat Oncol Biol Phys* 2009; 74: 987–1001
- 10 Polgár C, Van Limbergen E, Pötter R et al. Patient selection for accelerated partial-breast irradiation (APBI) after breast-conserving surgery: recommendations of the Groupe Européen de Curiethérapie-European Society for Therapeutic Radiology and Oncology (GEC-ESTRO) breast cancer working group based on clinical evidence (2009). *Radiother Oncol* 2010; 94: 264–273
- 11 Poortmans P, Struikmans H, Kirkove C et al. Irradiation of the internal mammary and medical supraclavicular lymph nodes in stage I to III breast cancer: 10 years results of the EORTC Radiation Oncology and Breast Cancer Groups phase III trial 22922/10925. ECCO 2013, Amsterdam, Presidential Session, LBA 2
- 12 Denkert C, von Minckwitz G, Brase JC et al. Tumor-infiltrating lymphocytes and response to neoadjuvant chemotherapy with or without carboplatin in human epidermal growth factor receptor 2-positive and triple-negative primary breast cancers. *J Clin Oncol* 2015; 33: 983–991
- 13 Francis PA, Regan MM, Fleming GF et al. Adjuvant ovarian suppression in premenopausal breast cancer. *N Engl J Med* 2015; 372: 436–446
- 14 Gnant M, Mlineritsch B, Stoeger H et al. Zoledronic acid combined with adjuvant endocrine therapy of tamoxifen versus anastrozol plus ovarian function suppression in premenopausal early breast cancer: final analysis of the Austrian Breast and Colorectal Cancer Study Group Trial 12. *Ann Oncol* 2015; 26: 313–320
- 15 Cuzick J, Sestak J, Baum M et al. Effect of anastrozole and tamoxifen as adjuvant treatment for early-stage breast cancer: 10 year analysis of the ATAC trial. *Lancet Oncol* 2010; 11: 1135–1141
- 16 Regan MM, Neven P, Giobbie-Hurder A et al. Assessment of letrozole and tamoxifen alone and in sequence for postmenopausal women with steroid hormone receptor-positive breast cancer: the BIG 1–98 randomised clinical trial at 8.1 years median follow-up. *Lancet Oncol* 2011; 12: 1101–1108
- 17 Burstein HJ, Temin S, Anderson H et al. Adjuvant endocrine therapy for women with hormone receptor-positive breast cancer: american society of clinical oncology clinical practice guideline focused update. *J Clin Oncol* 2014; 32: 2255–2269
- 18 Nitz U, Gluz O, Kates RE et al. Prognostic impact of discordance between different risk assessment tools in early breast cancer: Early outcome analysis from the prospective phase III WSG-PlanB trial. *SABCS 2014; P4-11-01*
- 19 Wolff AC, Hammond ME, Hicks DG et al. Recommendations for human epidermal growth factor receptor 2 testing in breast cancer: American Society of Clinical Oncology/College of American Pathologists clinical practice guidelines update. *J Clin Oncol* 2013; 31: 3997–4013
- 20 Untch M, Jackisch C, Schneeweiss A et al. A randomized phase III trial comparing neoadjuvant chemotherapy with weekly nanoparticle-based paclitaxel with solventbased paclitaxel followed by anthracycline/cyclophosphamide for patients with early breast cancer (GeparSepto); GBG 69. *SABCS 2014; S2-07*
- 21 Sikov WM, Berry DA, Perou CM et al. Impact of the addition of carboplatin and/or bevacizumab to neoadjuvant once-per-week paclitaxel followed by dose-dense doxorubicin and cyclophosphamide on pathologic complete response rates in stage II to III triple-negative breast cancer: CALGB 40603 (Alliance). *J Clin Oncol* 2015; 33: 13–21
- 22 von Minckwitz G, Schneeweiss A, Loibl S et al. Neoadjuvant carboplatin in patients with triple-negative and HER2-positive early breast cancer (GeparSixto; GBG 66): a randomised phase 2 trial. *Lancet Oncol* 2014; 15: 747–756
- 23 Ando M. Randomized phase II study of weekly paclitaxel with and without carboplatin followed by cyclophosphamide/Epirubicin/5-fluorouracil as neoadjuvant chemotherapy for stage II/IIIA breast cancer without HER2 overexpression. *Breast Cancer Res Treat* 2014; 145: 401–409
- 24 Coleman R, Gnant M, Paterson A et al. Effects of bisphosphonate treatment on recurrence and cause-specific mortality in women with early breast cancer. A meta-analysis of individual patient data from randomized trials. *SABCS 2013; S4-07*
